# Supplementary material
Source: PubMed Central journal article supplement (PMC8581108)
Supplement: 10815_2021_2270_MOESM3_ESM.pdf [file 10815_2021_2270_MOESM3_ESM.pdf]

**Not Just Carriers: Experiences of X-linked Female Heterozygotes**  
*Journal of Assisted Reproduction and Genetics*

Jennifer Choi<sup>1</sup>, Taylor Kane<sup>2</sup>, Lauren Propst<sup>3</sup>, Sara Spencer<sup>4</sup>, Jamie Kostialik<sup>5</sup>, Aishwarya Arjunan<sup>5</sup>

<sup>1</sup> Northwestern University Graduate Program in Genetic Counseling, Chicago, IL, USA

<sup>2</sup> Remember the Girls Inc, Mount Laurel, NJ, USA

<sup>3</sup> BillionToOne, Menlo Park, CA, USA

<sup>4</sup> Division of Clinical Genetics, Department of Obstetrics and Gynecology, Northwestern University Feinberg School of Medicine, Chicago, IL, USA

<sup>5</sup> Myriad Women's Health, South San Francisco, CA, USA

Corresponding Author

Correspondence to Jennifer Choi ([jennifer.choi1@northwestern.edu](mailto:jennifer.choi1@northwestern.edu))

### Online Resource 3: Supplemental Table

The supplemental table included in this document is the full breakdown of the participant demographic information.

**Supplemental Table 1: Demographic Information**

|                                        |                |
|----------------------------------------|----------------|
| <b>Age</b>                             | <b>n = 146</b> |
| 21-30                                  | 18 (12.3%)     |
| 31-40                                  | 63 (43.2%)     |
| 41-50                                  | 33 (22.6%)     |
| 51-60                                  | 20 (13.7%)     |
| 61-70                                  | 8 (5.5%)       |
| 71+                                    | 4 (2.7%)       |
| <b>Gender Identity</b>                 | <b>n = 147</b> |
| Female                                 | 147 (100%)     |
| <b>Location Type</b>                   | <b>n = 147</b> |
| Suburban                               | 82 (55.8%)     |
| City                                   | 35 (23.8%)     |
| Rural                                  | 30 (20.4%)     |
| <b>Ethnicity</b>                       | <b>n = 147</b> |
| White (non-Hispanic/Latinx)            | 131 (89.1%)    |
| Hispanic/Latinx                        | 6 (4.1%)       |
| White (Hispanic/Latinx)                | 6 (4.1%)       |
| South Asian                            | 2 (1.4%)       |
| Native Hawaiian/Pacific Islander       | 1 (0.01%)      |
| Prefer not to answer                   | 1 (0.01%)      |
| <b>Religion</b>                        | <b>n = 147</b> |
| Christianity                           | 97 (65.9%)     |
| Spiritual but not affiliated/religious | 19 (12.9%)     |

|                                                                   |                |
|-------------------------------------------------------------------|----------------|
| Prefer not to answer                                              | 12 (8.2%)      |
| Judaism                                                           | 9 (6.1%)       |
| Agnostic                                                          | 7 (4.8%)       |
| Atheist                                                           | 6 (4.1%)       |
| Islam                                                             | 3 (2.0%)       |
| Other                                                             | 3 (2.0%)       |
| <b>Education Level</b>                                            | <b>n = 147</b> |
| Less than high school degree                                      | 2 (1.4%)       |
| High school degree or equivalent (e.g. GED)                       | 13 (8.8%)      |
| Some college                                                      | 26 (17.7%)     |
| Associate degree                                                  | 18 (12.2%)     |
| Bachelor degree                                                   | 49 (33.3%)     |
| Graduate degree (Master's degree, professional degree, doctorate) | 39 (26.5%)     |
| <b>Employment Status</b>                                          | <b>n = 147</b> |
| Employed full-time                                                | 61 (41.5%)     |
| Unemployed (not currently looking for work)                       | 23 (15.7%)     |
| Employed part-time                                                | 17 (11.6%)     |
| Unable to work                                                    | 16 (10.9%)     |
| Self-employed                                                     | 13 (8.8%)      |
| Retired                                                           | 9 (6.1%)       |
| Unemployed (currently looking for work)                           | 4 (2.7%)       |
| Student                                                           | 4 (2.7%)       |
| <b>Marital Status</b>                                             | <b>n = 146</b> |
| Married                                                           | 114 (78.1%)    |
| Separated/divorced                                                | 16 (11.0%)     |
| Single (never married)                                            | 10 (6.9%)      |

|                                |                |
|--------------------------------|----------------|
| In a domestic partnership      | 5 (3.4%)       |
| Widowed                        | 1 (0.7%)       |
| <b>Annual Household Income</b> | <b>n = 143</b> |
| Less than \$10,000             | 4 (2.8%)       |
| \$10,000 to \$24,999           | 10 (7.0%)      |
| \$25,000 to \$49,999           | 16 (11.2%)     |
| \$50,000 to \$74,999           | 29 (20.3%)     |
| \$75,000 to \$99,999           | 23 (16.1%)     |
| \$100,000 to \$149,999         | 31 (21.7%)     |
| \$150,000 and greater          | 30 (21.0%)     |
| <b>Have Children</b>           | <b>n = 146</b> |
| Yes                            | 130 (89.0%)    |
| No                             | 16 (11.0%)     |
| <b>Plan Future Children</b>    | <b>n = 146</b> |
| Yes                            | 18 (12.3%)     |
| No                             | 105 (71.9%)    |
| Unsure                         | 23 (15.8%)     |
